# Supplementary material
Source: PubMed Central journal article supplement (PMC7796915)
Supplement: NIHMS1626011-supplement-1.pdf [file NIHMS1626011-supplement-1.pdf]

## **Supplemental Information**

### **Human Stem Cell-Derived Dopamine Neurons Repair the Damaged Circuits and Restore Neural Function in a Mouse Model of Parkinson's Disease**

Man Xiong, Yezheng Tao, Qinqin Gao, Ban Feng, Wei Yan, Yingying Zhou, Thomas A. Kotsonis, Tingli Yuan, Zhiwen You, Ziyang Wu, Jiajie Xi, Alexander Haberman, Julia Graham, Jasper Block, Wenhao Zhou, Yuejun Chen, and Su-Chun Zhang

# Figure S1

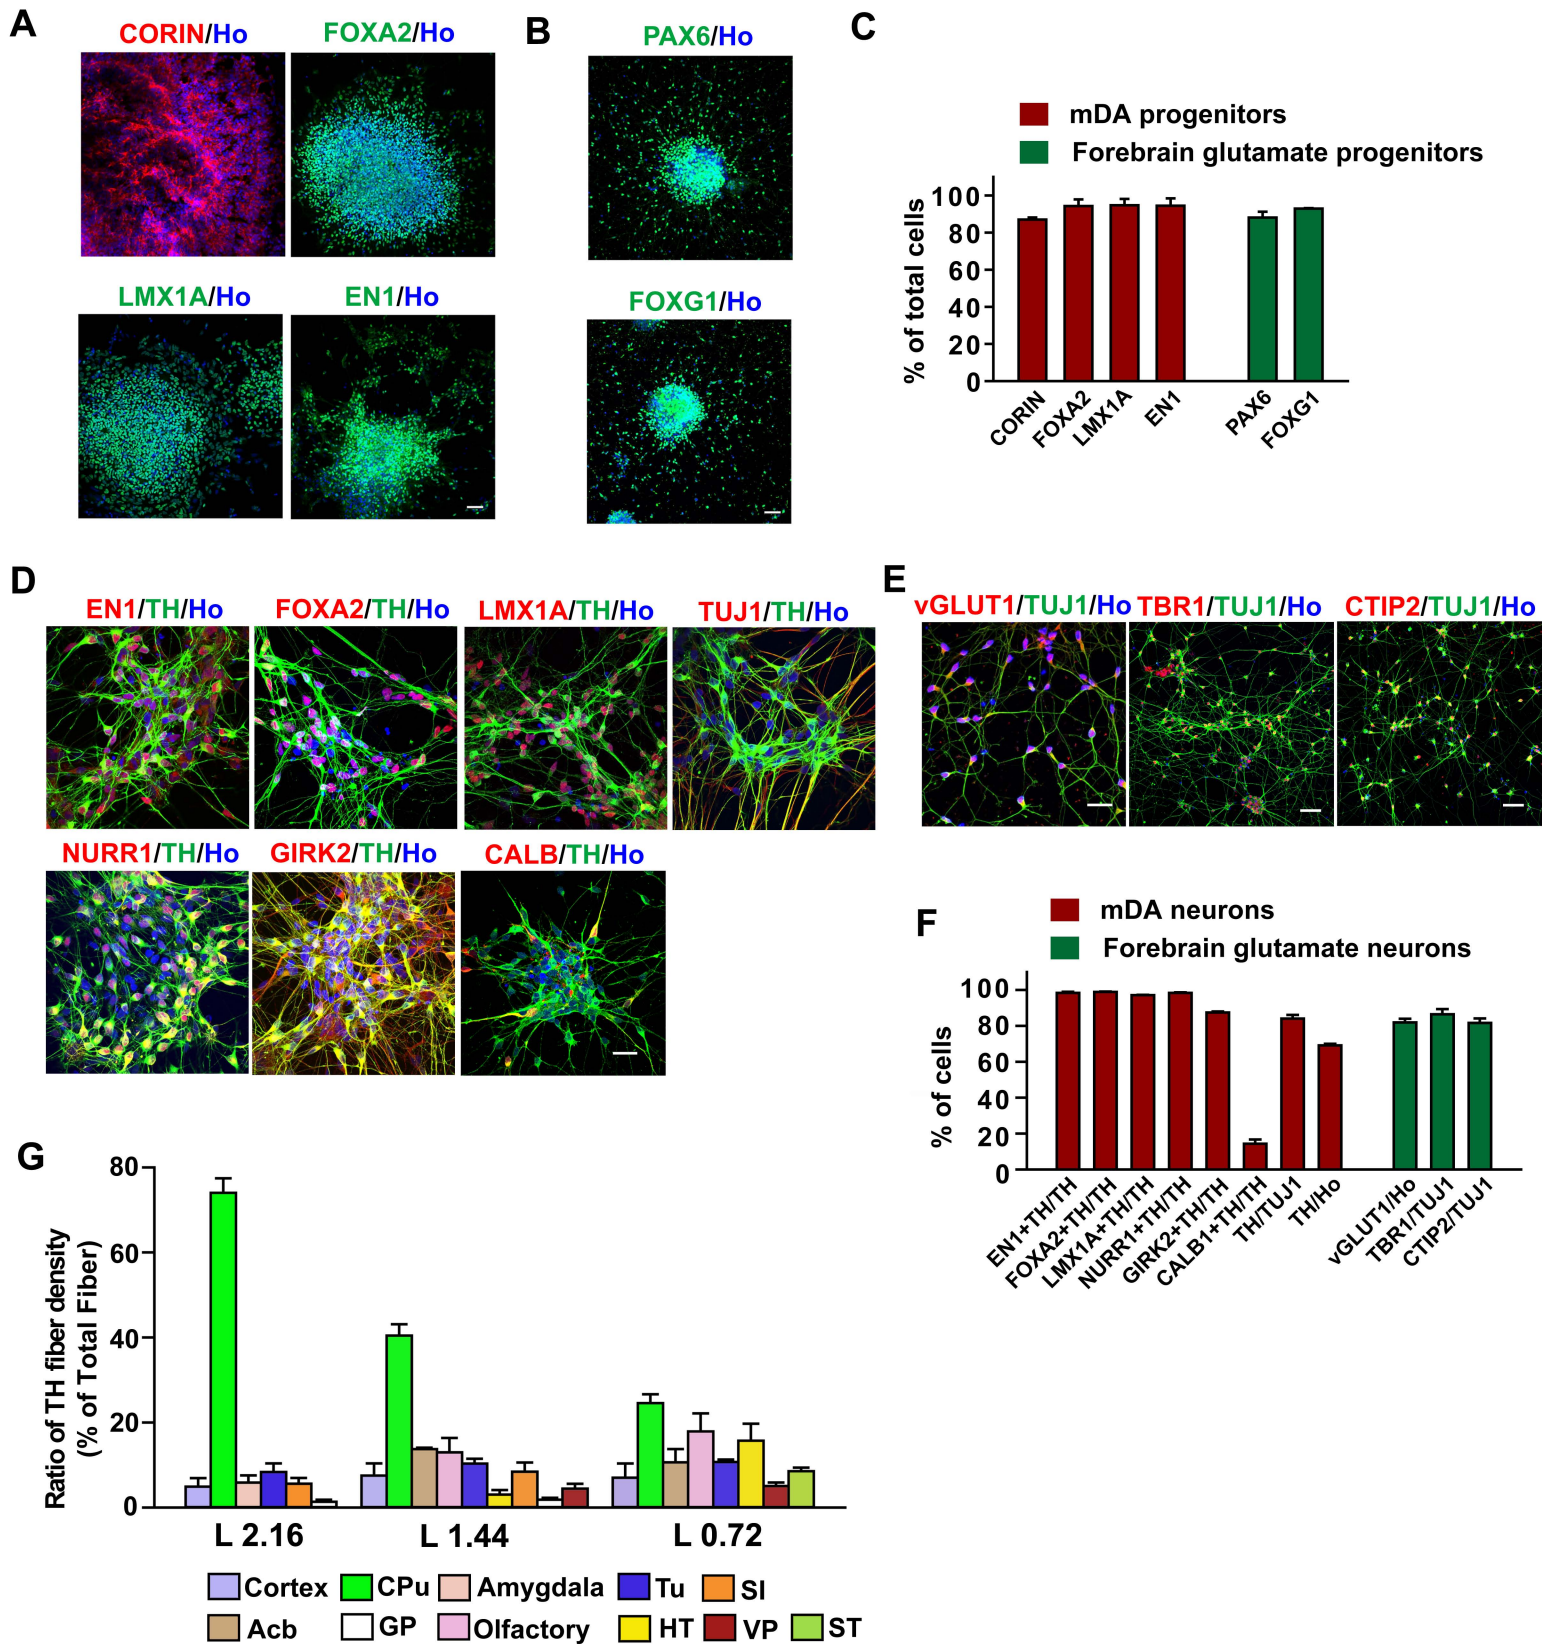

**Figure S1. mDA and Glu neuron differentiation *in vitro* and TH fiber distribution *in vivo* (related to Figure 1).**

(A-B) Immunostaining of day-32 cultures derived from hESCs shows markers for mDA progenitors (A) and forebrain glutamate progenitors (B). Ho, Hoechst. Scale bar = 25  $\mu\text{m}$ . (C) Quantification of cellular differentiation presented in (A) and (B). (D-E) Immunostaining of day-42 cultures derived from hESCs shows markers for mDA neurons (D) and forebrain glutamate neurons (E). Scale bar = 25  $\mu\text{m}$ . (F) Quantification of cellular differentiation presented in (D) and (E). (G) Quantification of the regional distribution of TH<sup>+</sup> fibers from wild type mice as in figure 1D. n = 5. TH<sup>+</sup> positive cell bodies in the cortex were included in our calculation. See supplemental Table 1 for abbreviations.

# Figure S2

**A**

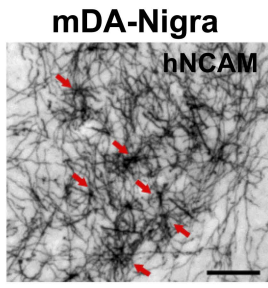

**B**

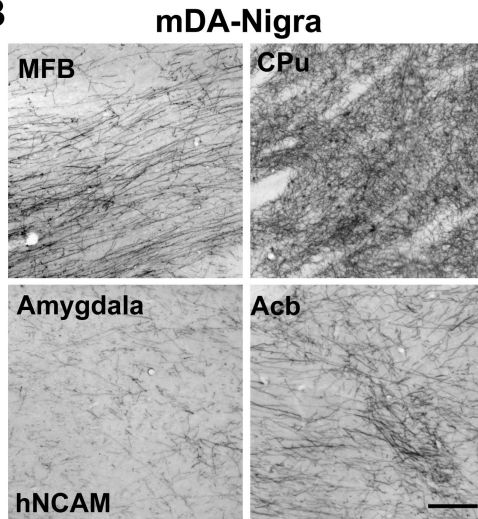

**C**

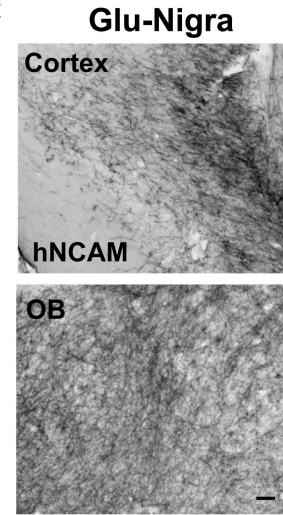

**D**

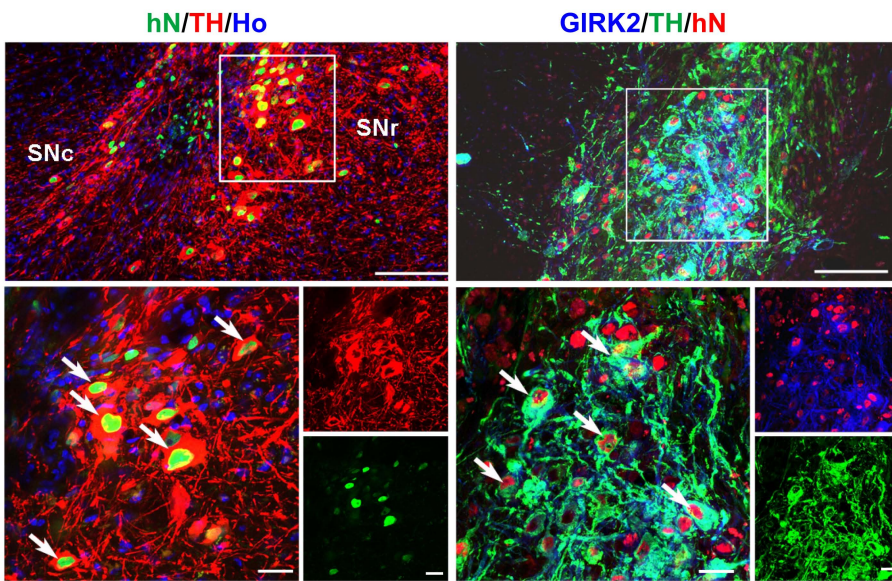

**E**

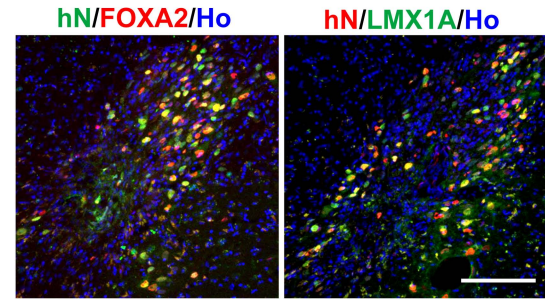

**F**

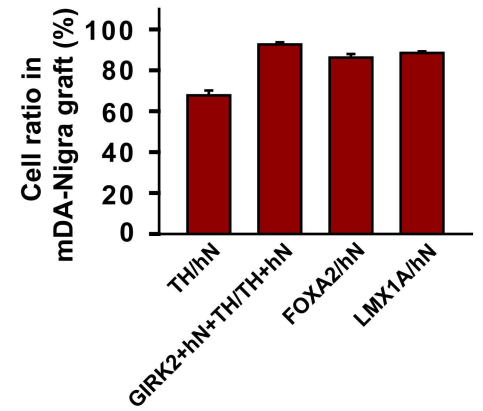

**G**

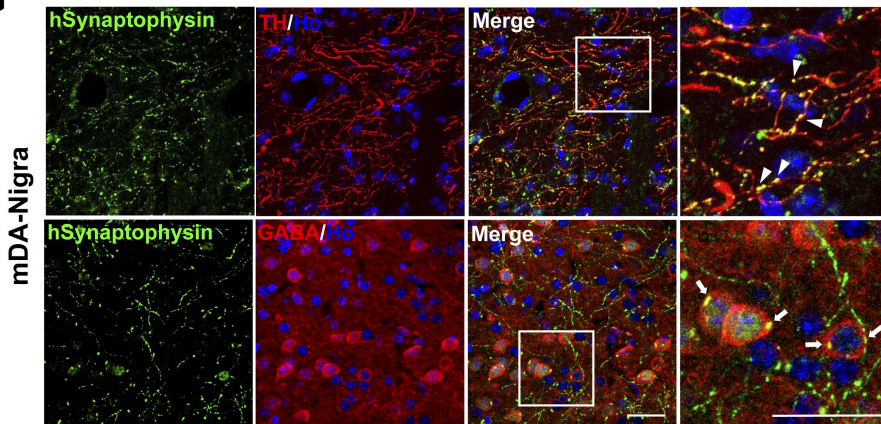

**H**

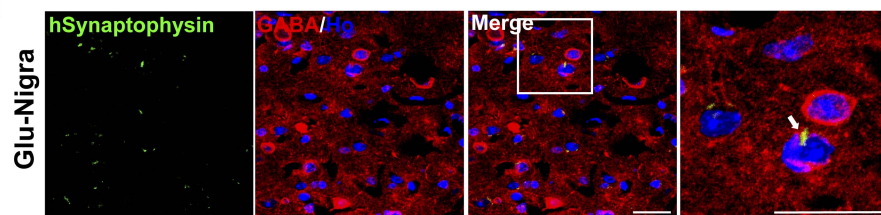

**Figure S2. Survival, axonal projection, and synaptogenesis of nigrally transplanted mDA and Glu neurons (related to Figure 2).**

(A) Immunohistochemistry images for hNCAM from PD mouse brain with nigrally grafted mDA neurons show distribution and arborization of hNCAM<sup>+</sup> fibers in CPu. The red arrows indicate bead-like structure of hNCAM<sup>+</sup> fibers. Scale bar = 50  $\mu$ m. (B) Immunohistochemistry images from lesioned mouse brain with nigrally grafted mDA neurons show morphology of hNCAM<sup>+</sup> fibers in different brain regions. Scale bar = 125  $\mu$ m. (C) Immunohistochemistry images for hNCAM from PD mouse brain with nigrally grafted Glu neurons show distribution and arborization of hNCAM<sup>+</sup> fibers in cortex and OB (olfactory bulb). Scale bar = 125  $\mu$ m. See supplemental Table 1 for abbreviations. (D) Immunohistochemistry images show that the grafted TH positive cells in nigra co-express human nuclei (hN) and GIRK2. Boxed regions are magnified below. Scale bar = 100  $\mu$ m for large images, Scale bar = 25  $\mu$ m for magnified images. Arrows indicate double positive cells. (E) Immunohistochemistry images show that the grafted human nuclei (hN) positive cells in nigra co-express FOXA2 and LMX1A. Scale bar = 100  $\mu$ m. (F) Quantification of cell identity presented in (D and E). (G) The mouse brain with nigrally grafted mDA neurons were stained for human-specific synaptophysin and TH (upper panel) or GABA (lower panel) in the host CPu. Boxed areas are magnified on the right. White arrowheads indicate co-localization of human-specific synaptophysin with TH along the TH fibers. White arrows indicate co-localization of human-specific synaptophysin with GABA around the GABA neuron cell body. (H) The mouse brain with nigrally grafted Glu neurons was stained for human-specific synaptophysin and GABA in the host CPu. Boxed areas are magnified on the right. White arrows indicate co-localization of human-specific synaptophysin with GABA around the GABA neuron cell body.

# Figure S3

**A**

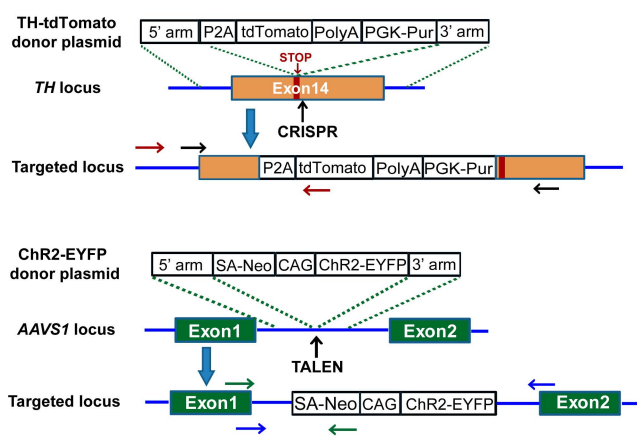

**B**

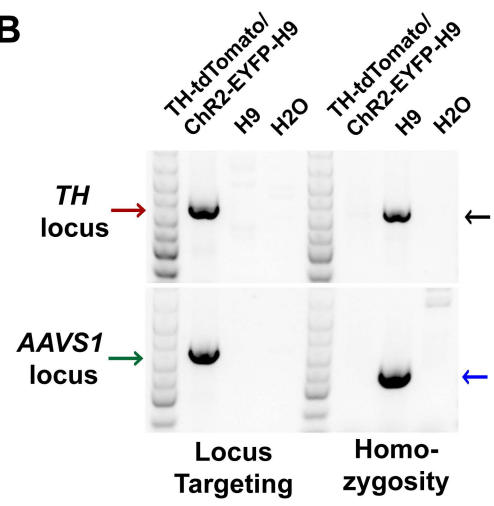

**C**

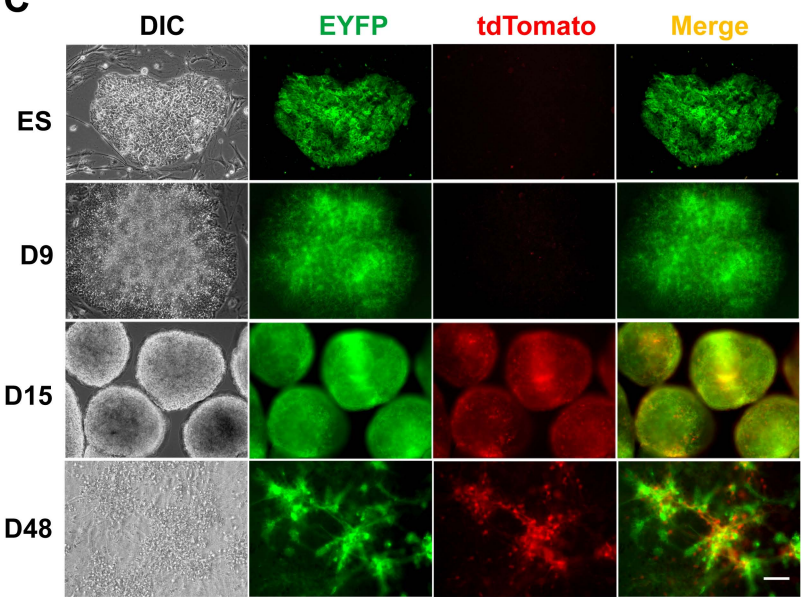

**D**

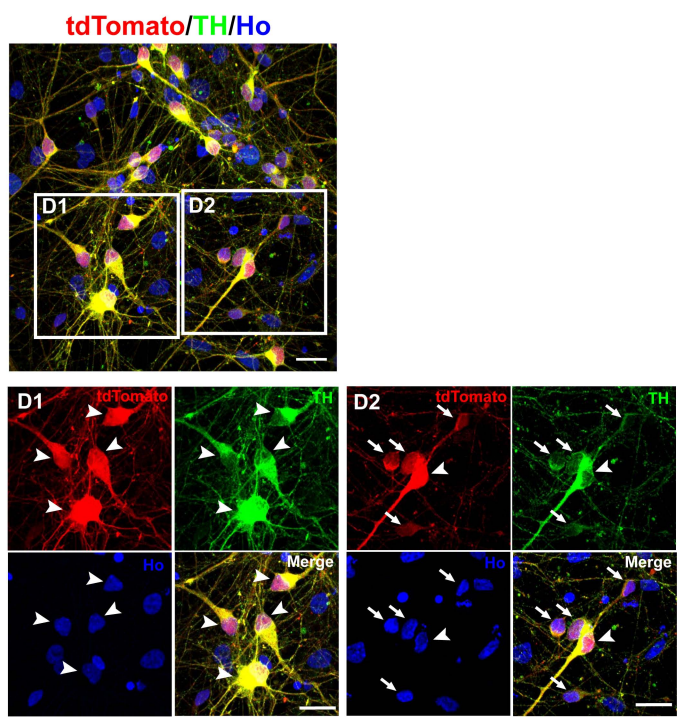

**E**

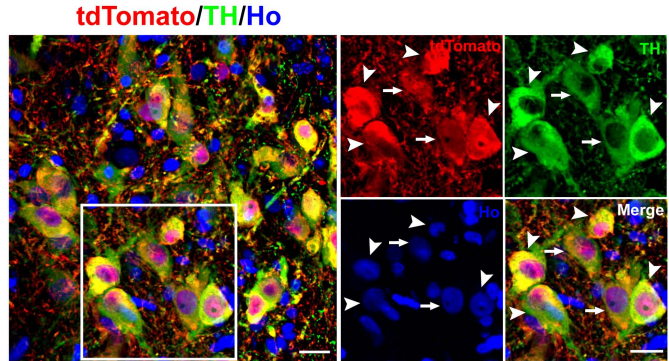

**F**

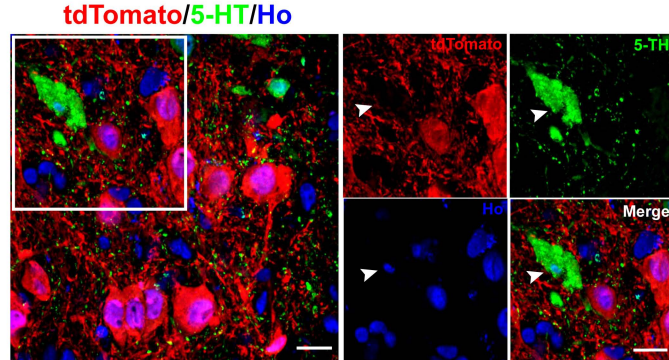

**G**

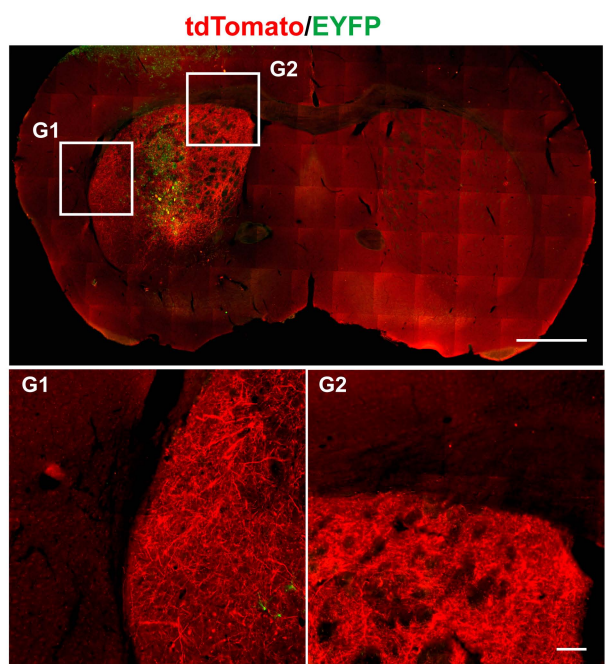

**H**

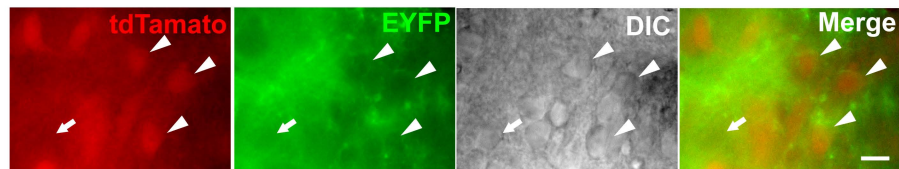

**Figure S3. Establishment and characterization of TH-tdTomato/AAVS1-ChR2-EYFP hESC line (related to Figure 3).**

(A) Schematic diagram of the genotyping strategy for TH-tdTomato/AAVS1-ChR2-EYFP hESC line. PCR primers for TH locus insertion or homozygosity are indicated by the red arrows and black arrows, respectively. PCR primers for AAVS1 locus insertion or homozygosity are indicated by the green arrows and blue arrows, respectively. (B) PCR genotyping of the TH-tdTomato/AAVS1-ChR2-EYFP hESC line. The expected PCR product for correctly targeted *TH* locus or *AAVS1* locus are ~1200 bp (red arrow) or ~1000 bp (green arrow), respectively. Heterozygosity of the cell line is identified by the PCR product of ~1000 bp (black arrow) or ~650 bp (blue arrow) for *TH* locus or *AAVS1* locus, respectively. Those clones without ~1000 bp or ~650 bp PCR products are homozygous. The mother cell line H9 ESCs is included as control. TH-tdTomato/AAVS1-ChR2-EYFP hESC line is homozygous in both *TH* locus and *AAVS1* locus. (C) DIC and fluorescent images show expression of EYFP and tdTomato in the ESCs or during mDA neuron differentiation of TH-tdTomato/AAVS1-ChR2-EYFP hESCs. tdTomato is expressed in the mid (D15) and terminal (D48) stages, but not in the ES or early stage (D9) stages of mDA neuron differentiation. Scale bar = 100  $\mu$ m. (D) Immunostaining of day 42 cultures derived from the above hESCs shows co-expression of tdTomato in TH<sup>+</sup> neurons. Boxed areas are magnified below. White arrowheads indicate neurons with high expression of tdTomato and TH. White arrows indicate neurons with low expression of tdTomato and TH. Scale bar = 20  $\mu$ m. (E) Immunohistochemistry images show the expression of tdTomato in TH<sup>+</sup> neurons in the nigral mDA graft. Boxed areas are magnified right. White arrowheads and white arrows indicate neurons with high expression of tdTomato and TH or low expression of tdTomato and TH, respectively. Scale bar = 20  $\mu$ m. (F) Immunohistochemistry images show 5-HT<sup>+</sup> serotonin neuron in the nigral mDA graft. Boxed areas are magnified right. White arrowheads indicate tdTomato<sup>-</sup> and 5-HT<sup>+</sup> neurons. Scale bar = 20  $\mu$ m. (G) Coronal section away from the graft site immunostained for tdTomato and EYFP from the PD mouse brain striatally grafted with mDA neurons derived from TH-tdTomato/AAVS1-ChR2-EYFP hESCs, showing specific projection of mDA neuron in the CPu, but not neighboring brain regions. Scale bar = 1 mm. Boxed areas are magnified below. Scale bar = 100  $\mu$ m. (H) DIC and fluorescent images of a slice from the PD mouse brain nigraly grafted with mDA neurons derived from TH-

tdTomato/AAVS1-ChR2-EYFP hESCs. White arrowheads indicate tdTomato<sup>+</sup> mDA neurons, and white arrow indicates tdTomato<sup>-</sup> non-mDA neurons in the EYFP<sup>+</sup> graft. Scale bar = 50  $\mu$ m.



# Figure S4

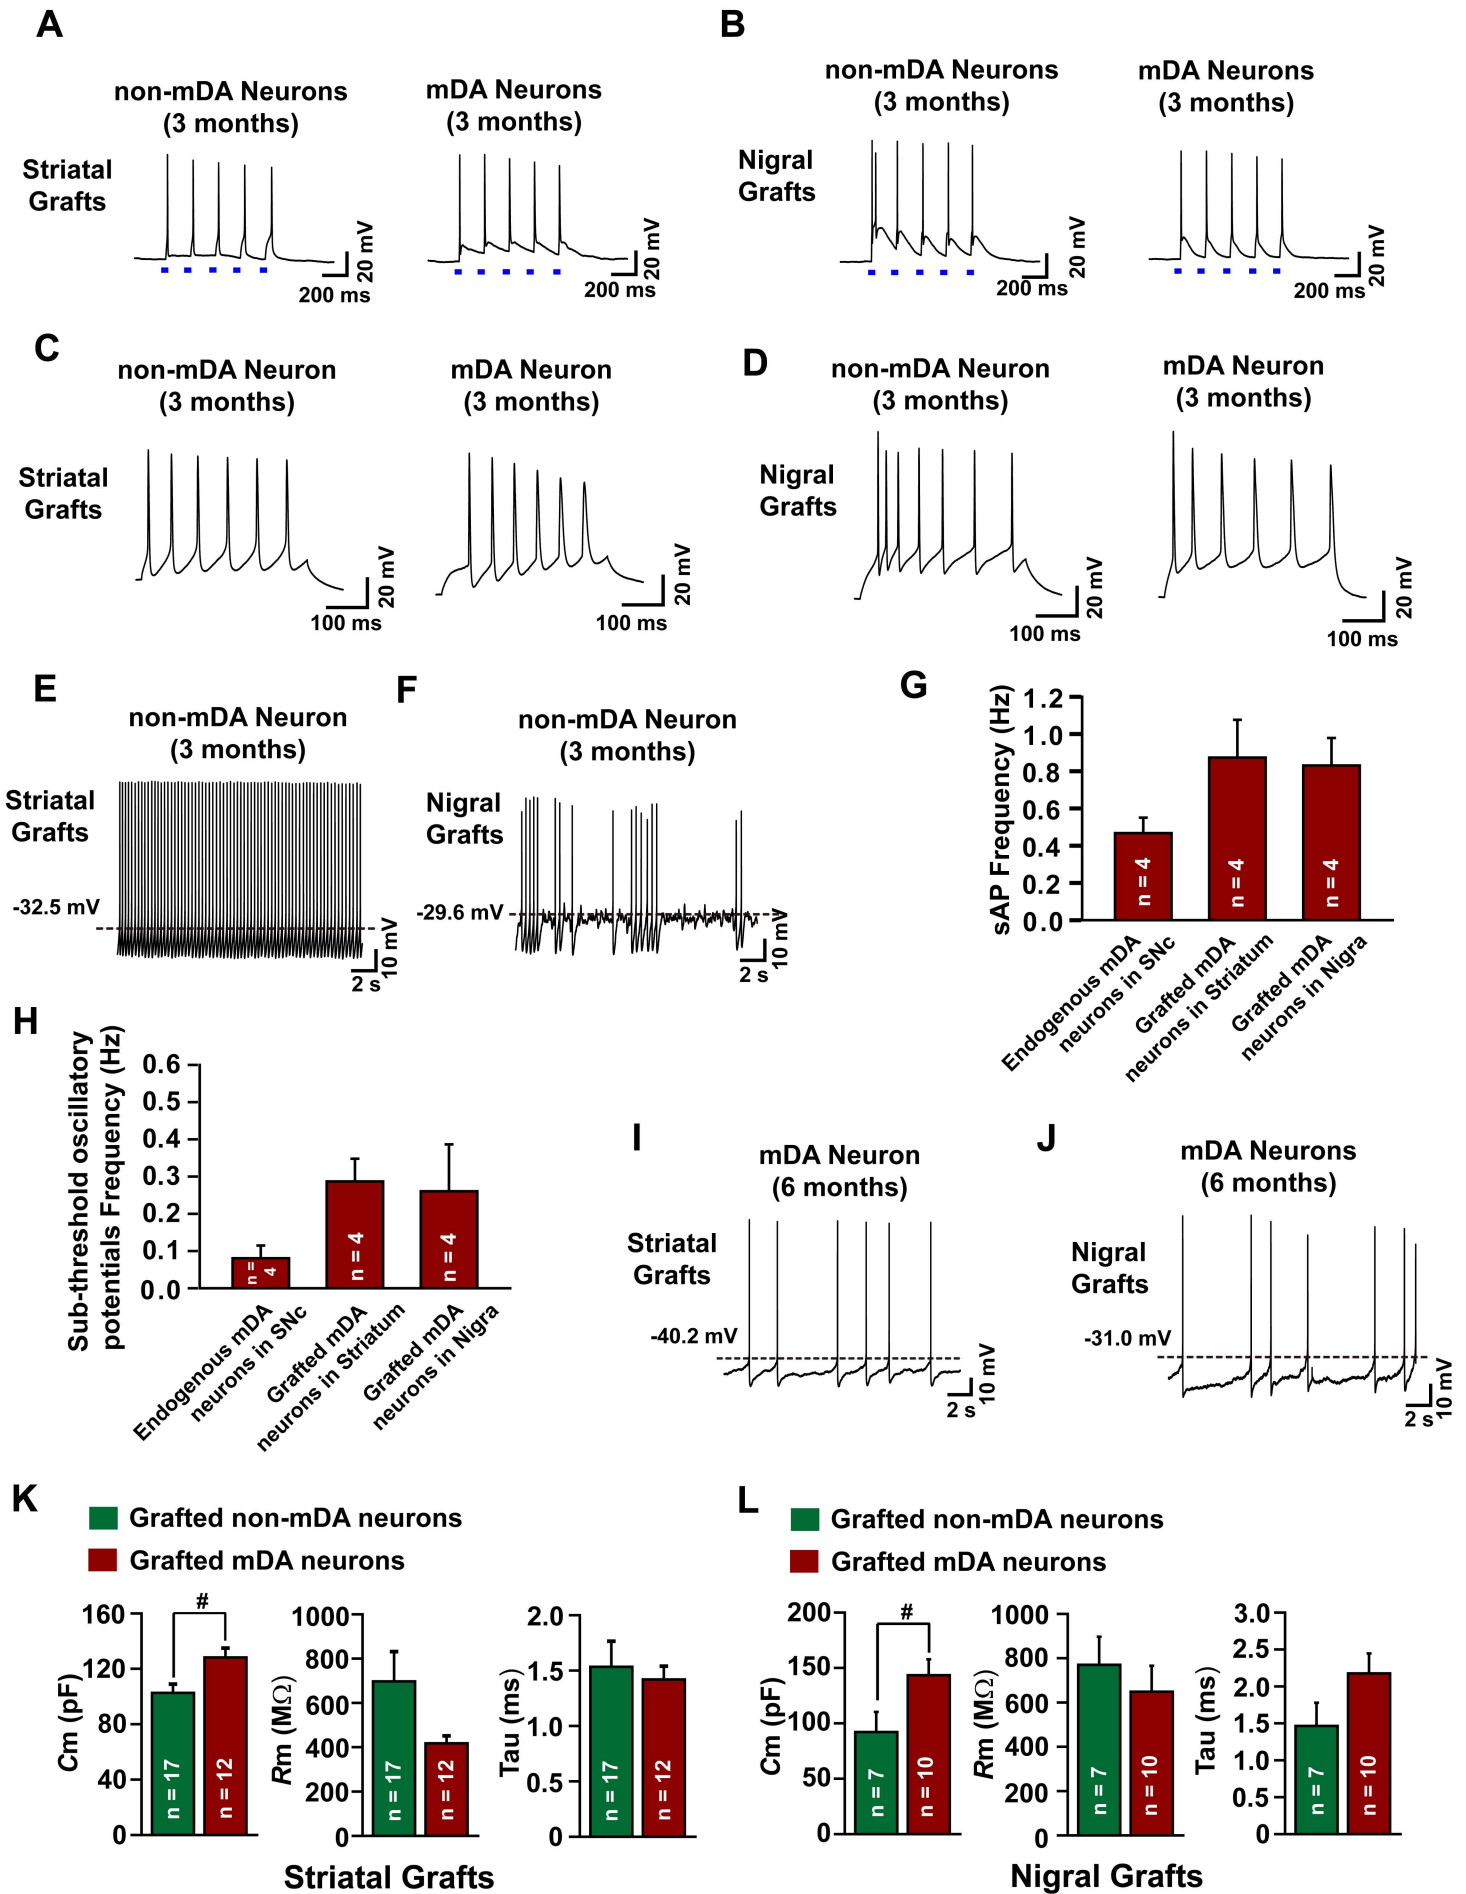

**Figure S4. Electrophysiological examination of functional maturation of human mDA or non-mDA neurons grafted in nigra or striatum (related to Figure 3).**

(A-D) Typical whole-cell patch-clamp recording of blue light-induced action potentials (APs) (A and B) or current-induced APs (C and D) in striatally (A and C) or nigraly (B and D) grafted human mDA or non-mDA neurons at 3 months after transplantation. (E and F) Typical whole-cell patch-clamp recording of spontaneous action potentials (sAPs) in striatally (E) or nigraly (F) grafted human non-mDA neurons at 3 months after transplantation. The dashed lines indicate threshold potentials. (G and H) The spontaneous action potential frequency (sAP) (G) and the sub-threshold oscillation potentials frequency (H) of endogenous SNc mDA neurons from mDA neuron reporter mice (DAT-Cre/Ai9), or striatally or nigraly grafted human mDA neurons at 3 months after transplantation were plotted. Data are represented as mean  $\pm$  SEM. The sample number for statistics is indicated in the column. One-way ANOVA,  $p > 0.05$ . (I and J) Typical whole-cell patch-clamp recording of spontaneous action potentials (sAPs) in striatally (I) or nigraly (J) grafted human mDA neurons at 6 months after transplantation. The dashed lines indicate threshold potentials. (K and L) The input resistance ( $R_m$ ), membrane capacitance ( $C_m$ ), and Tau of striatally (K) or nigraly (L) grafted human non-mDA and mDA neurons at 6 months after transplantation were plotted. Data are represented as mean  $\pm$  SEM. The sample number for statistics is indicated in the column. Student-t test,  $^{\#}p < 0.05$ .

# Figure S5

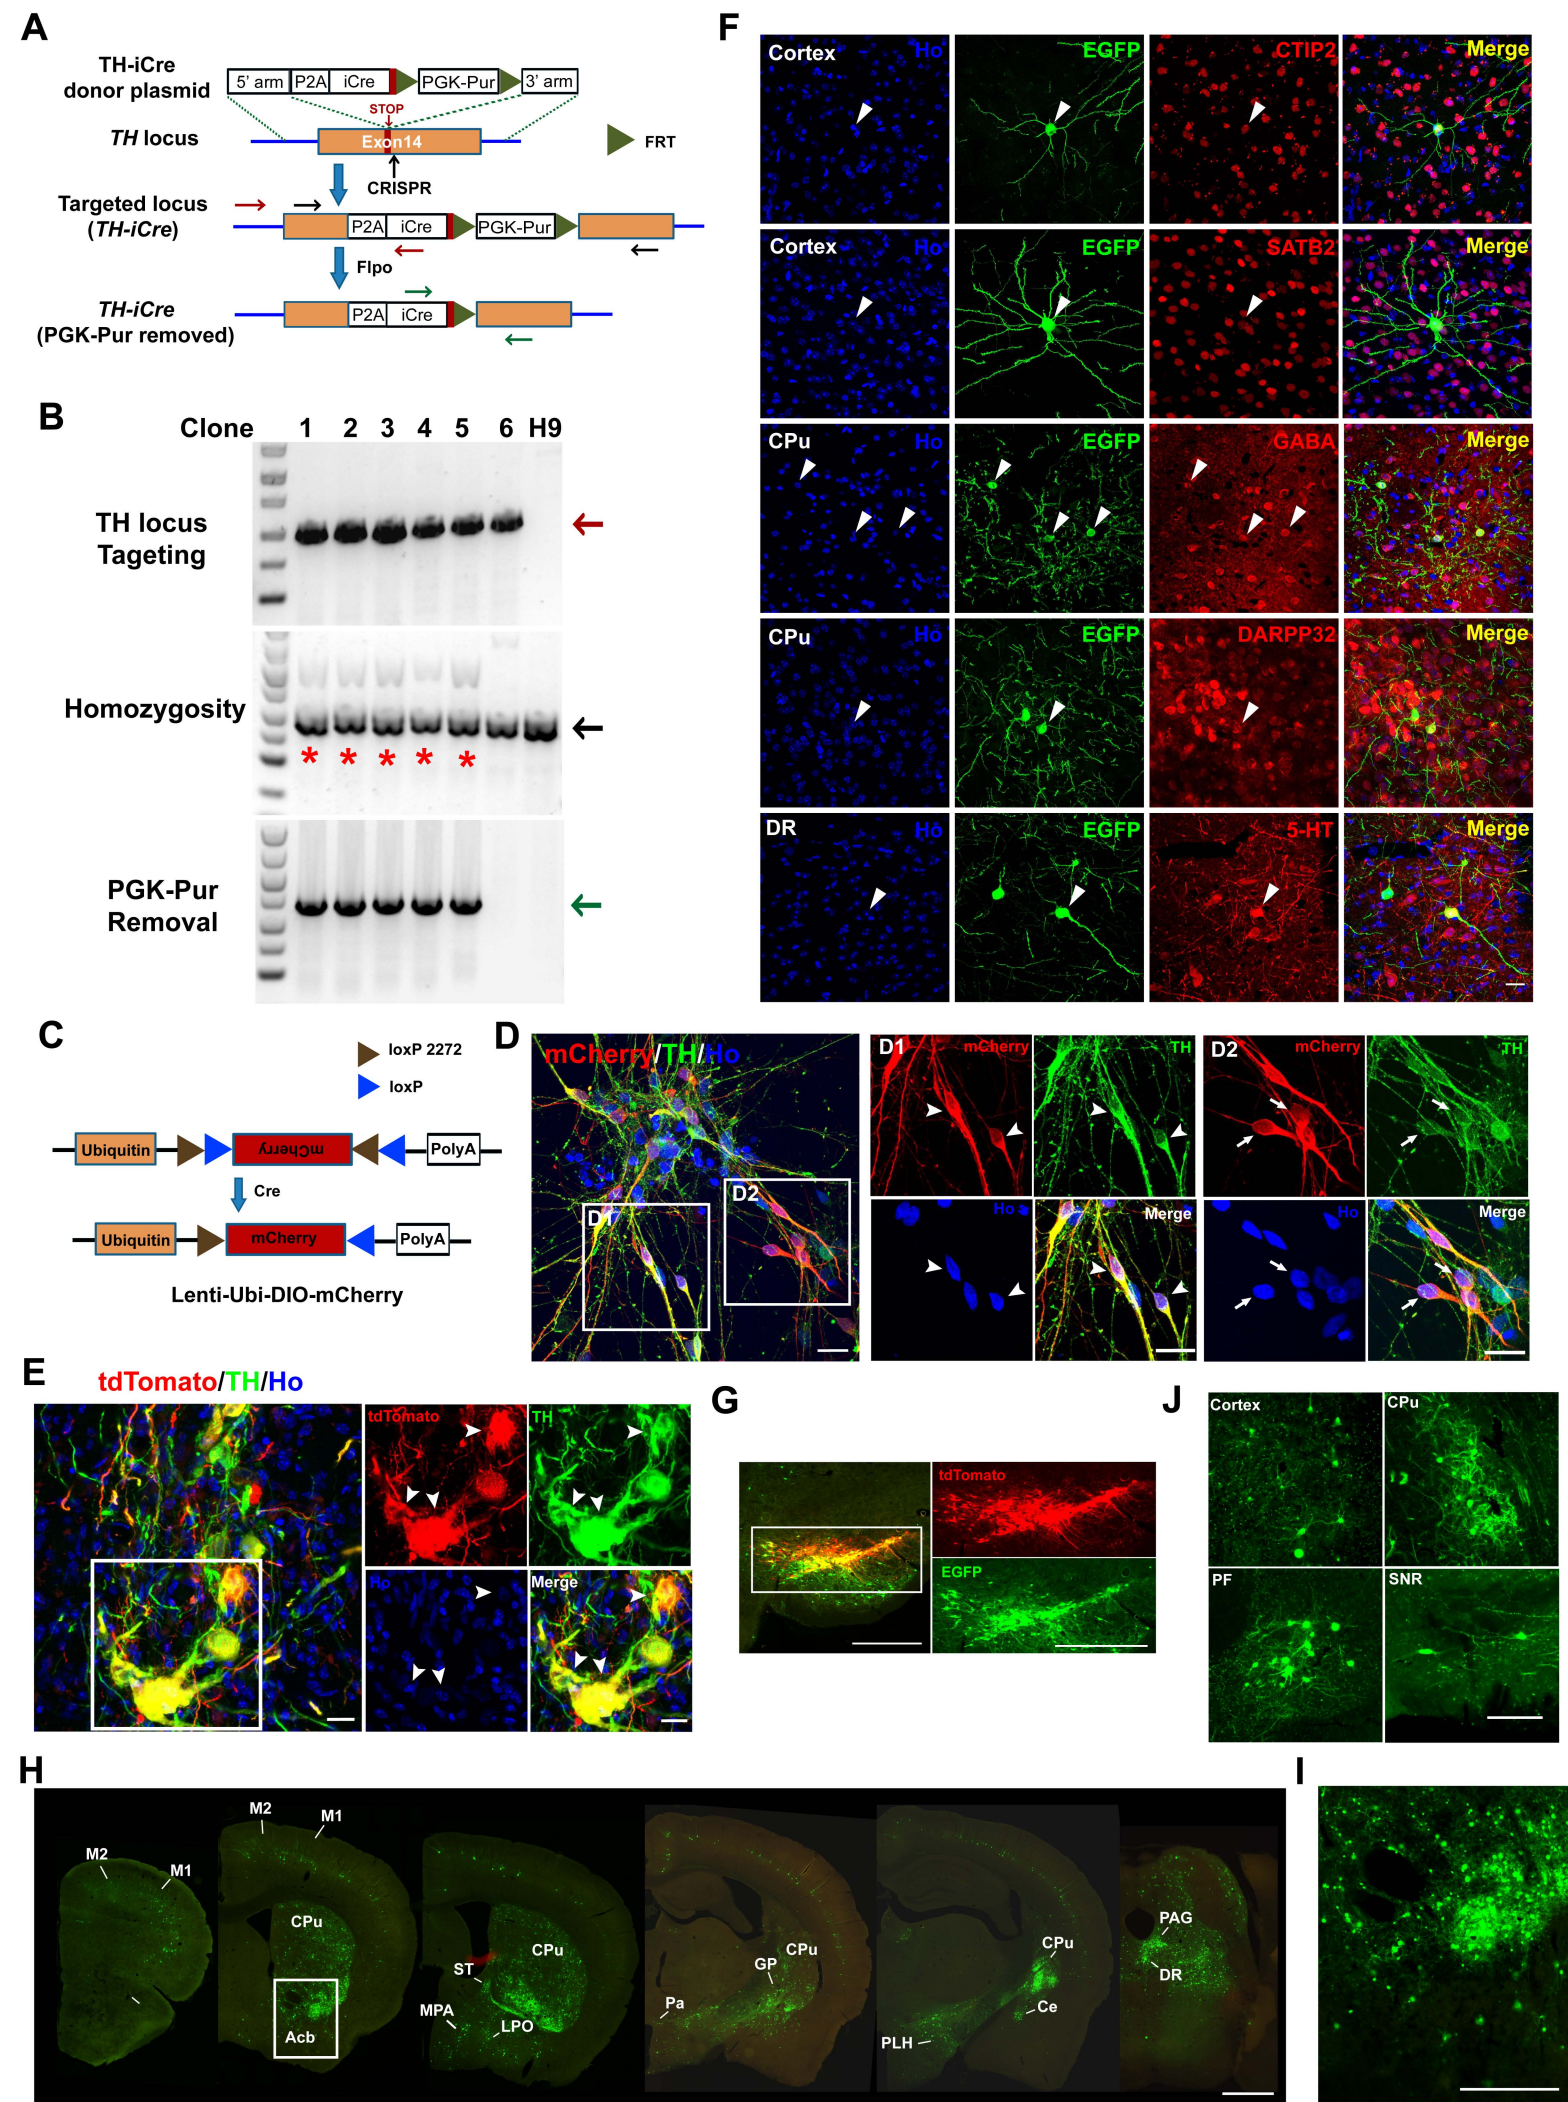

**Figure S5. Establishment of TH-iCre hESC line and Rabies-mediated tracing of inputs to genetically labeled human and endogenous mDA neurons in mice (related to Figure 4).**

(A) Schematic diagram of the genotyping strategy for TH-iCre hESC line. PCR primers for TH locus insertion or homozygosity are indicated by the red arrows and black arrows, respectively. PCR primer for PGK-Pur removal is indicated by the green arrows.

(B) PCR genotyping of the TH-iCre hESC line. The expected PCR product for correctly targeted TH locus are ~1000 bp (red arrow). Homozygous clones are identified by the PCR product of ~1000bp (black arrow). Those clones without ~1000 bp PCR products are homozygous. The expected PCR product for PGK removal is ~750 bp (green arrow). The mother cell line (H9 ESCs) is included as control. Heterozygous clones in TH locus with PGK-Pur removal (red asterisks) are selected for experiments.

(C) Schematic depiction of lentivirus encoding Cre-dependent expression of mCherry driven by the ubiquitin promoter (Lenti-Ubi-DIO-mCherry).

(D) mDA neuron cultures derived from TH-iCre hESCs infected by Lenti-Ubi-DIO-mCherry show mCherry expression in the TH<sup>+</sup> mDA neurons. Boxed areas are magnified right. White arrowheads indicate co-expression of mCherry and TH in mDA neurons. White arrows indicate mCherry expressing neurons with low TH expression. Scale bar = 20 μm.

(E) Immunohistochemistry images show co-expression of tdTomato and TH in striatally grafted mDA neurons derived from TH-iCre hESC line infected by AAV-DIO-TVA-2A-NLS-tdTomato 6 months after transplantation. Boxed areas are magnified right. White arrowheads indicate co-expressed neurons. Scale bar = 20 μm.

(F) Immunohistochemistry images show CTIP2<sup>+</sup> or SATB2<sup>+</sup> neurons in cortex, GABA<sup>+</sup> or DARPP32<sup>+</sup> neurons in CPu, 5-HT<sup>+</sup> neuron in DR connected to nigraly grafted human mDA neurons. White arrow heads indicate co-expressed neurons. Ho, Hoechst. Scale bar = 100 μm.

(G) Rabies-mediated trans-synaptic tracing of endogenous mDA neurons. Confocal images show EGFP and tdTomato expressing neurons in the SNc of DAT-Cre mice. Scale bar = 0.5 mm.

(H) Series of coronal sections show distribution of traced neurons (EGFP<sup>+</sup>/tdTomato<sup>-</sup>) for endogenous mDA neurons in DAT-Cre mice. Only the side ipsilateral to the graft site is shown. Scale bar = 1 mm. Boxed area is magnified in (I).

(I) Magnified image shows patch-like distribution of labeled input neurons to endogenous mDA neurons. Scale bar = 0.5 mm.

(J) High-magnified images of labeled input neurons to striatally grafted mDA neurons in different host brain regions. Scale

bar = 200  $\mu\text{m}$ . See supplemental Table 1 for abbreviations.

# Figure S6

**A**

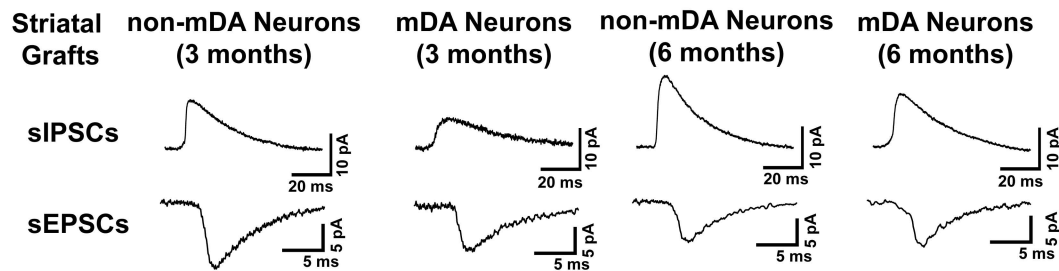

**B**

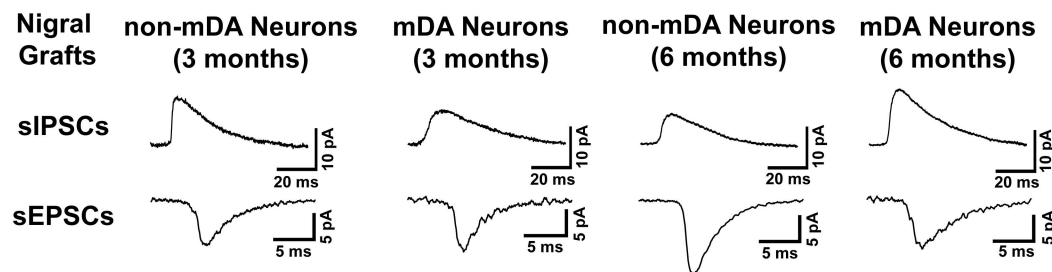

**C**

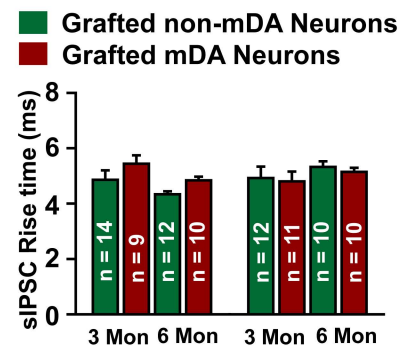

**D**

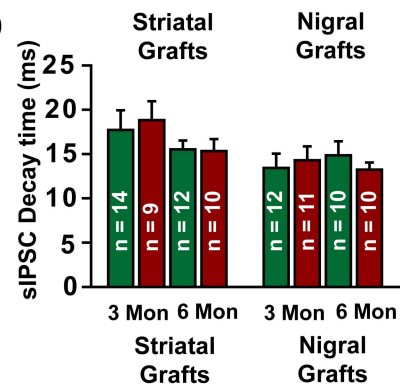

**E**

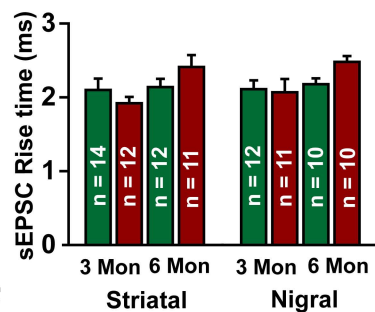

**F**

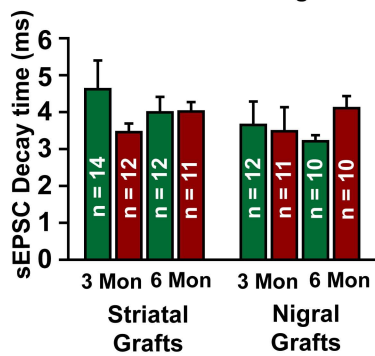

**G**

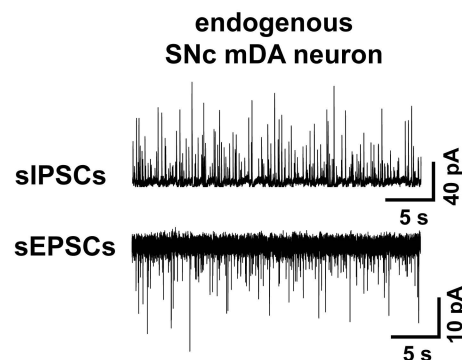

**H**

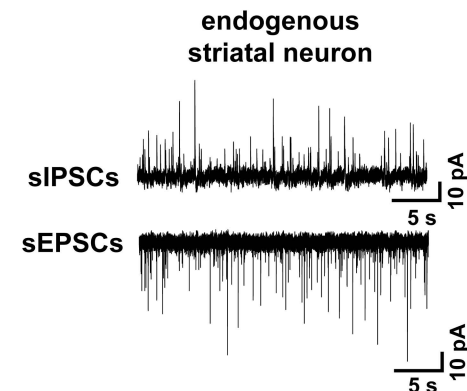

**Figure S6. Functional inputs to endogenous neurons and the kinetics of sIPSCs and sEPSCs in grafted neurons (related to Figure 5).**

(A and B) Representative traces from spontaneous excitatory postsynaptic currents (sEPSCs) and spontaneous inhibitory postsynaptic currents (sIPSCs) in striatal (A) or nigral (B) grafted non-mDA or mDA neurons in the brain slices at 3 or 6 months after transplantation. (C-F) Quantitative analysis of isolated sEPSCs and sIPSCs in A and B. Data are represented as mean  $\pm$  SEM. The sample number for statistics is indicated in the column. One-way ANOVA followed by Holm-Sidak post hoc test.  $p > 0.05$ . (G and H) Typical whole-cell patch-clamp recording of sEPSCs and sIPSCs in endogenous lateral SNc mDA (G) or striatal neurons (H) of the brain slices from wild type SCID mice.

# Figure S7

**A**

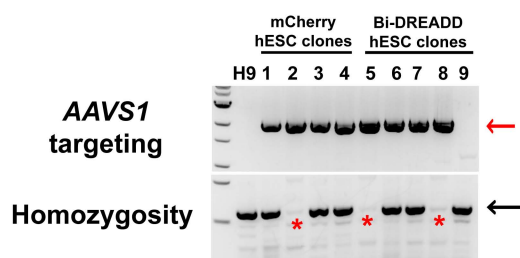

**B**

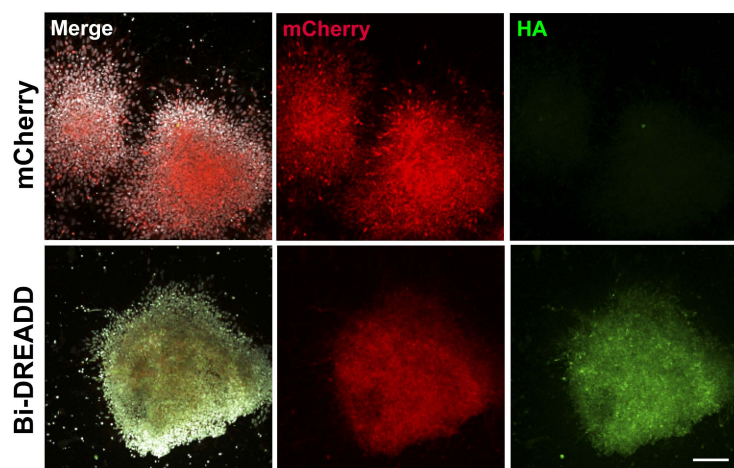

**C**

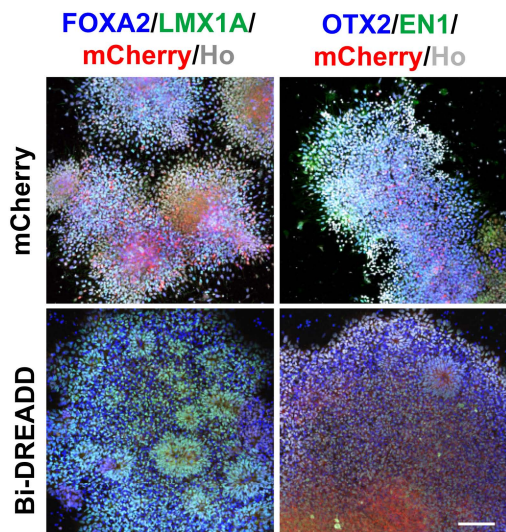

**D**

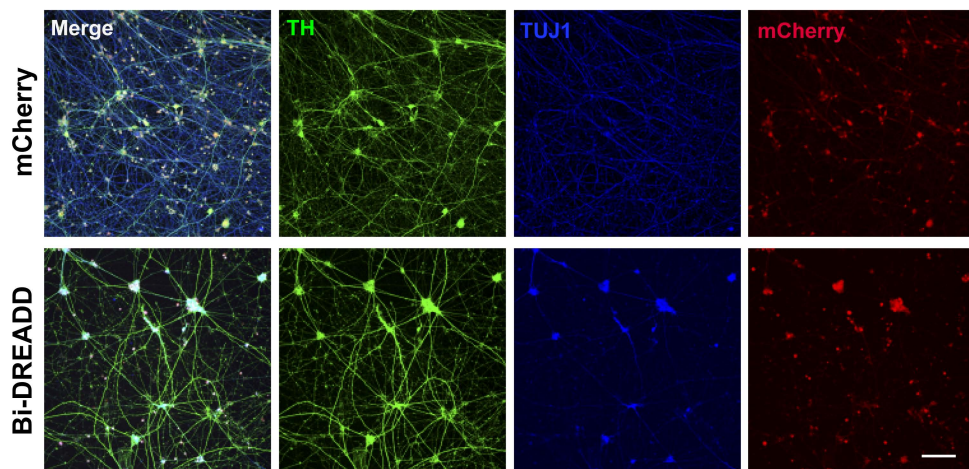

**E**

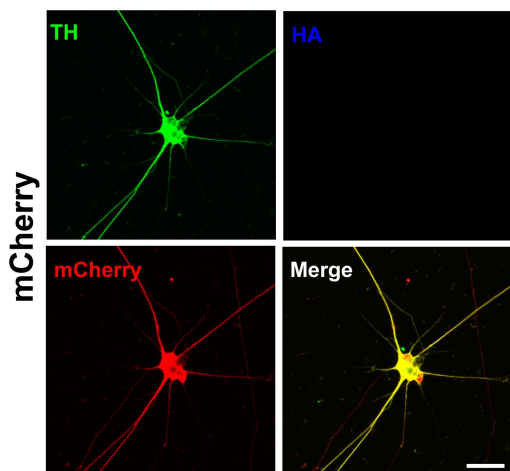

**F**

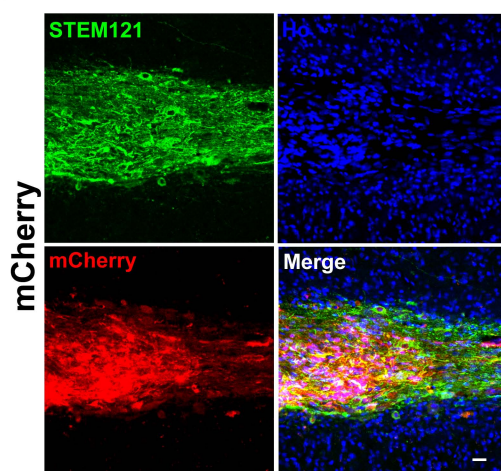

**G**

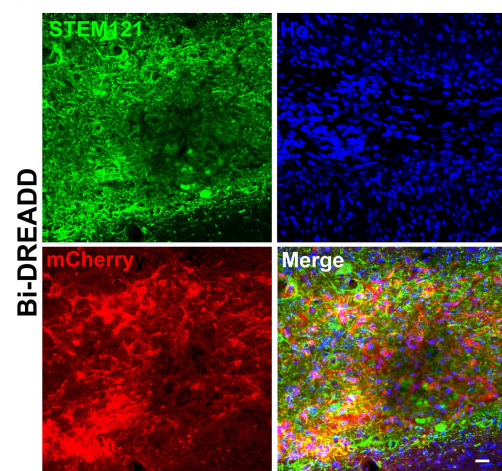



**Figure S7. Establishment and characterization of mCherry- and Bi-DREADD-expressing hESC lines (related to Figure 7).**

(A) PCR genotyping of mCherry- or Bi-DREADD-expressing hESC clones. The expected PCR products for correctly targeted *AAVS1* locus are ~2000bp (red arrows). Homozygous clones are identified by those without PCR products of ~650 bp (black arrow) in homozygosity test, and clones with ~650 bp PCR products are heterozygous. Homozygous clones (red asterisk) are selected for experiments. (B) Immunostaining shows expression of mCherry, hM<sub>3</sub>Dq-mCherry or HA-tagged KORD in mCherry or Bi-DREADD hESCs. Scale bar = 50 μm. (C) Immunostaining for mDA neuron progenitor markers at day 16 of differentiation from mCherry or Bi-DREADD hESCs. Ho, Hoechst. Scale bar = 50 μm. (D) Immunostaining of day 42 cultures derived from mCherry- or Bi-DREADD-expressing hESCs shows markers for mDA neurons. Scale bar = 50 μm. (E) Immunostaining shows co-expression of TH, mCherry, but not HA-tagged KORD in mDA neurons at day 42 of differentiation from mCherry hESCs. Scale bar = 50 μm. (F and G) Immunohistochemistry images show that the nigraly grafted mDA neurons derived from mCherry hESCs (F) or Bi-DREADD hESCs (G) co-expressed transgene mCherry or hM<sub>3</sub>Dq-mCherry and human STEM121. Scale bar = 20 μm.

**Table S1. Abbreviation list of anatomical areas in text and figure legends (related to Figures 1, 2, 4, S1, S2 and S5).**

| Abbreviation | Anatomical area                                            |
|--------------|------------------------------------------------------------|
| Acb          | Accumbens nucleus                                          |
| AcbC         | Accumbens nucleus core                                     |
| AcbSh        | Accumbens nucleus shell                                    |
| AI           | Agranular insular cortex                                   |
| Amy          | Amygdala                                                   |
| AOV          | Anterior olfactory nucleus, ventral part                   |
| APT          | Anterior pretectal nucleus                                 |
| ASt          | Amygdala striatal transition area                          |
| Ce           | Central nucleus of the amygdala                            |
| CPu          | Caudate putamen                                            |
| DR           | Dorsal raphe nucleus                                       |
| DTT          | Dorsal tenia tecta                                         |
| EA           | Extended amygdala                                          |
| FrA          | Frontal association cortex                                 |
| G            | Geniculate nucleus                                         |
| GP           | Globus pallidus                                            |
| Hipp         | Hippocampus                                                |
| HT           | Hypothalamus                                               |
| IPAC         | Interstitial nucleus of the posterior limb of the anterior |
| LPO          | Lateral preoptic nucleus                                   |
| M            | Motor cortex                                               |
| M1           | Primary motor cortex                                       |
| M2           | Secondary motor cortex                                     |
| MD           | Mediodorsal thalamic nucleus                               |
| MFB          | Medial forebrain bundle                                    |
| MnR          | Median raphe nucleus                                       |
| MPA          | Medial preoptic area                                       |
| mRt          | Mesencephalic reticular formation                          |
| OB           | Olfactory bulb                                             |

|       |                                         |
|-------|-----------------------------------------|
| Pa    | Paraventricular hypothalamic nucleus    |
| PAG   | Periaqueductal gray                     |
| PB    | Parabrachial nucleus                    |
| PF    | Parafascicular thalamic nucleus         |
| PLH   | Peduncular part of lateral hypothalamus |
| Pn    | Pontine reticular nucleus               |
| PO    | Preoptic area                           |
| PrCnF | Precuneiform area                       |
| SI    | Substantia innominata                   |
| SN    | Substantia nigra                        |
| SNC   | Substantia nigra, pars compacta         |
| SNR   | Substantia nigra, pars reticularis      |
| ST    | Bed nucleus of the stria terminalis     |
| STh   | Subthalamic nucleus                     |
| Tu    | Olfactory tubercle                      |
| VM    | Ventromedial thalamic nucleus           |
| VMH   | Ventromedial hypothalamic nucleus       |
| VP    | Ventral pallidum                        |
| VS    | Ventral striatum                        |
| ZI    | Zona incerta                            |
